# Supplementary material for: A Hybrid Machine Learning Approach to Screen Optimal Predictors for the Classification of Primary Breast Tumors from Gene Expression Microarray Data
Source: MDPI journal article supplement (doi:10.3390/diagnostics13040708), 2023-02-13
Supplement: s1 [file s1]

## Supplementary material

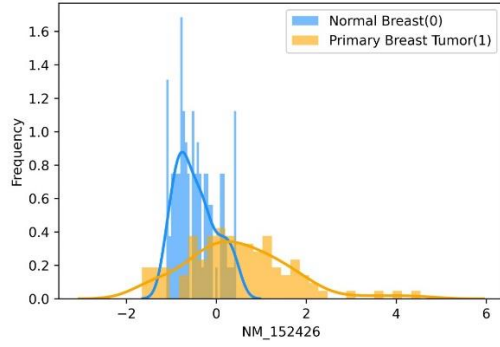

(a)

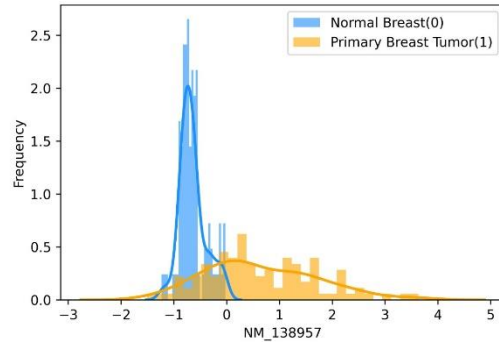

(b)

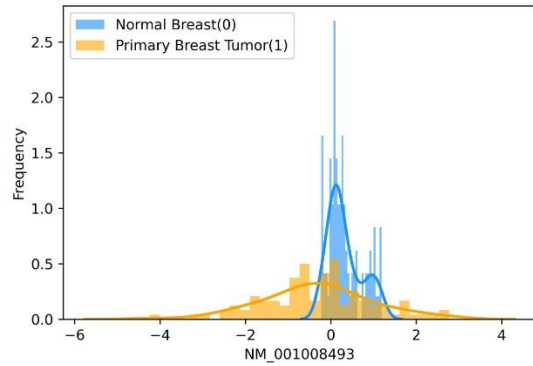

(c)

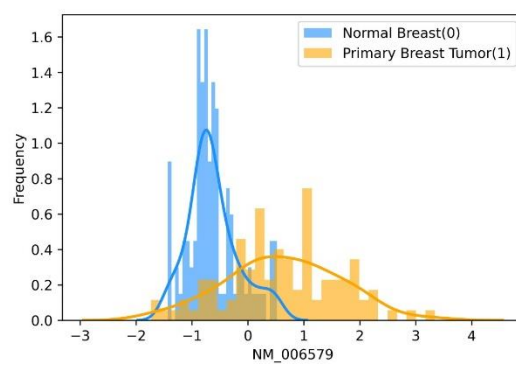

(d)

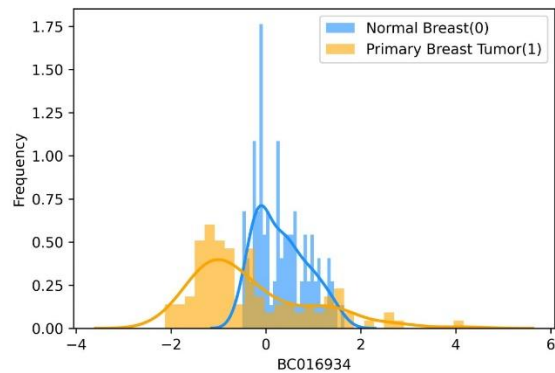

(e)

**Supplementary Figure S1 (a-e).** A pictorial representation of the histogram-based frequency distribution of the three optimal gene biomarkers (a) 'NM\_152426', (b) 'NM\_138957', (c) 'NM\_001008493', (d) 'NM\_006579', and (e) 'NM\_BC016934', between the two classes of population (normal breast and primary breast tumor samples).
